# Supplementary material for: Genome analysis of two novel Pseudomonas strains exhibiting differential hypersensitivity reactions on tobacco seedlings reveals differences in nonflagellar T3SS organization and predicted effector proteins
Source: PubMed Central journal article supplement (PMC5911992; doi:10.1002/mbo3.553), 2018-02-21
Supplement: MBO3-7-na-s001.pdf [file MBO3-7-na-s001.pdf]

16S rRNA

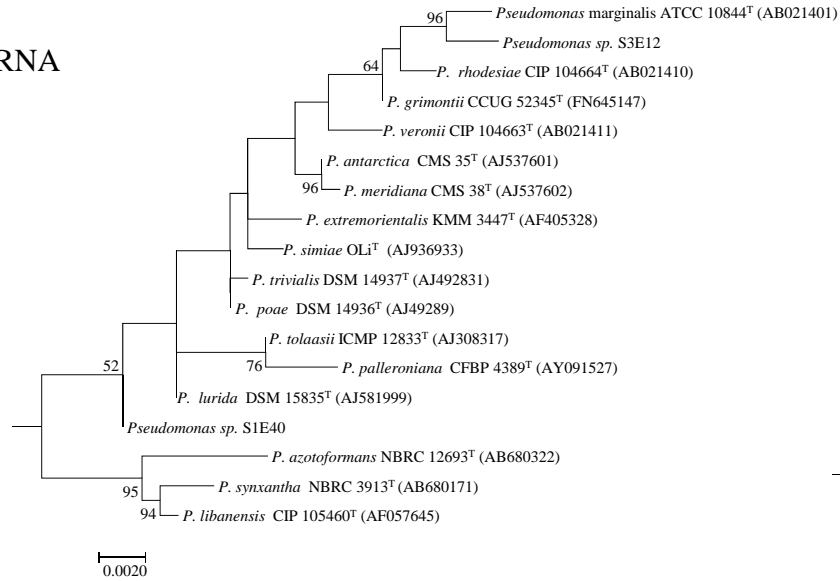

gyrB

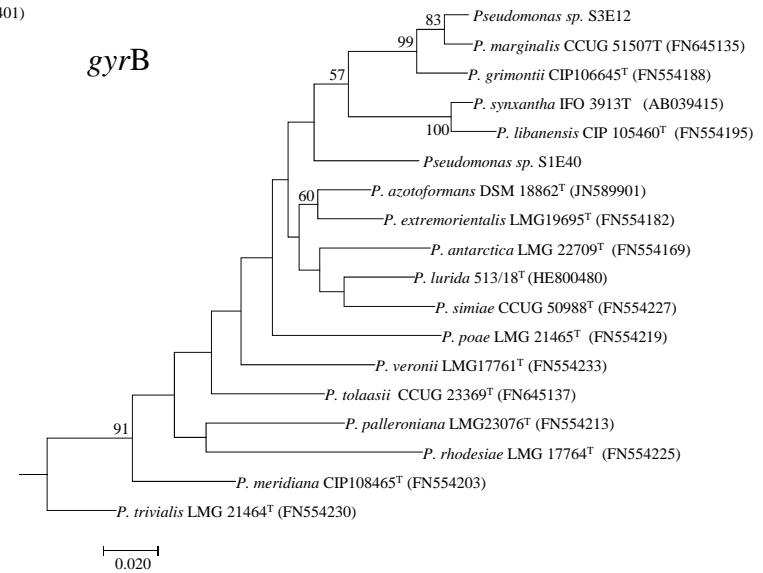

rpoB

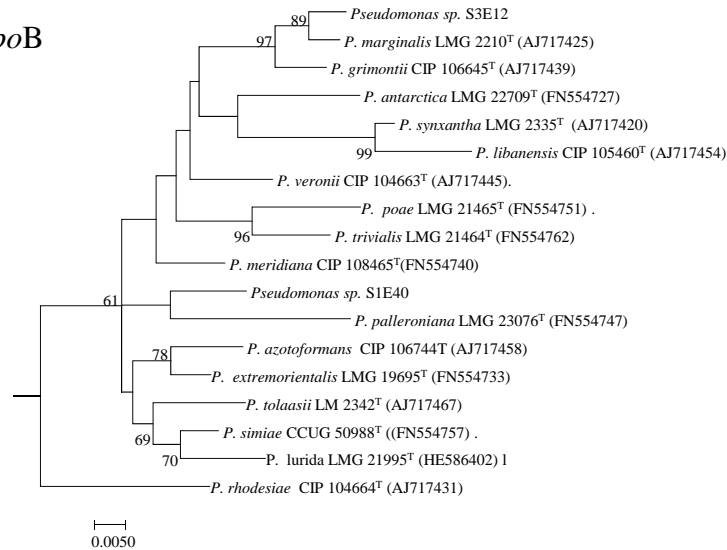

rpoD

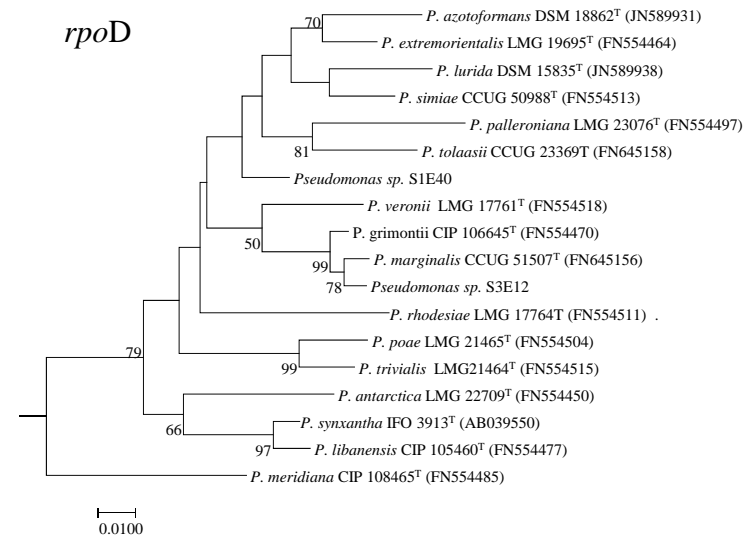

Figure S1. Single gene phylogenetic trees inferred by maximum-likelihood (ML) of *Pseudomonas sp.* strains S1E40 and S3E12 with type strains of close lineages using the general time reversible substitution model. A, 16S rRNA; B, *gyrB*; C, *rpoB*; and D, *rpoD*; ML trees were reconstructed for each gene sequences with 1000 bootstrap replicates. Bootstrap values higher than 50 are shown on nodes. *Pseudomonas aeruginosa* LMG1242<sup>T</sup> was used as outgroup.
